# Supplementary material for: Tracing the transitions from pluripotency to germ cell fate with CRISPR screening
Source: PubMed Central journal article supplement (PMC6191455; doi:10.1038/s41467-018-06230-0), 2018-10-16
Supplement: 41467_2018_6230_MOESM3_ESM.pdf [file 41467_2018_6230_MOESM3_ESM.pdf]

## Description of Additional Supplementary Files

**File Name:** Supplementary Data 1

**Description:** Gene ontology (GO) terms and *p-values* for differentially expressed in KO lines during PGCLC induction and enriched populations in the CRISPR screen.
